# Supplementary material for: Environmental and life cycle assessment of lithium carbonate production from Chilean Atacama brines
Source: Royal Society of Chemistry journal article supplement (doi:10.1039/d4su00223g), 2024-11-14
Supplement: d4su00223g1.pdf [file d4su00223g1.pdf]

## Supplementary material

### Environmental and life cycle assessment of lithium carbonate production from Chilean Atacama brines

Zijing He<sup>a</sup>, Anna Korre<sup>a,b\*</sup>, Geoff Kelsall<sup>c</sup>, Zhenggang Nie<sup>a</sup> and Melanie Colet Lagrille<sup>d</sup>

Departments of Earth Science and Engineering <sup>a</sup>, and of Chemical Engineering <sup>c</sup>, Imperial College London, London, SW7 2AZ, United Kingdom

<sup>b</sup> Energy Futures Lab, Imperial College London, London, SW7 2AZ, United Kingdom

<sup>d</sup> Department of Chemical Engineering, University of Chile, Av. Beauchef 851, 8370458 Santiago, Región Metropolitana, Chile.

\* Corresponding author. *E-mail address*: [a.korre@imperial.ac.uk](mailto:a.korre@imperial.ac.uk)

#### 1. Life Cycle Inventory

We present below further information of the life cycle inventory of lithium carbonate production, including effects of brine extraction, evaporation, and chemical production processes. The inputs and outputs of each individual unit process were modelled in Sphera software<sup>1</sup> and were calculated from the whole process net input and output data based on the process flow diagram (Fig.1). A summary of the lithium carbonate production input and output inventory is presented in Tables A1 and A2.

Table A1. Brine extraction and evaporation

| Description       | Input                 | Output | Unit | Ecoinvent 3.9.1 process and comments             |
|-------------------|-----------------------|--------|------|--------------------------------------------------|
| Pumped brine      | 327                   |        | kg   |                                                  |
| Diesel            | 9.44×10 <sup>-5</sup> |        | kW h | Diesel, burned in diesel-electric generating set |
| Electrical energy | 1.442                 |        | kW h | SING electricity grid mix                        |
| Heavy fuel oil    | 1.02×10 <sup>-6</sup> |        | kW h | Electricity from heavy fuel oil                  |
| Precipitation     | 1.03                  |        | kg   | Water, harvested from rainwater                  |
| Fresh water       | 18.7                  |        | kg   | Pumped from four water wells                     |
| Reinjected brine  |                       | 79.1   | kg   |                                                  |
| Evaporated water  |                       | 177    | kg   |                                                  |
| Lithium brine     |                       | 3.3    | kg   |                                                  |
| Waste salts       |                       | 68.9   | kg   | Wastes are accumulated at the edge of the salar  |
| Waste water       |                       | 18.7   | kg   |                                                  |

Table A2. Lithium carbonate chemical production

| Description             | Input                  | Output                | Unit           | Ecoinvent 3.9.1 process and comments                                         |
|-------------------------|------------------------|-----------------------|----------------|------------------------------------------------------------------------------|
| Lithium brine           | 3.3                    |                       | kg             | Concentrated lithium brine, at plant                                         |
| Transportation          | 230                    |                       | km             | Transport, freight, lorry 16-32 tonne                                        |
| Hydrochloric acid       | 0.04                   |                       | kg             | Hydrochloric acid (32 %)                                                     |
| Fresh water             | 12.5                   |                       | kg             | Water, ultrapure                                                             |
| Boron                   |                        | 0.0305                | kg             | Boric acid, anhydrous, powder                                                |
| Extraction solvent      | 0.014                  |                       | kg             | 2-Ethyl-1,3-hexanediol                                                       |
| Organic diluent         | 0.055                  |                       | kg             | Solvent 100, > 99 % Trimethylbenzenes                                        |
| Sodium hydroxide        | 3.36                   |                       | kg             | Sodium hydroxide, 50 % in H <sub>2</sub> O                                   |
| Sodium carbonate        | 1.81                   |                       | kg             | Sodium carbonate, 30 % in H <sub>2</sub> O                                   |
| Lime milk               | 2.85×10 <sup>-3</sup>  |                       | kg             | Lime water, 20 % in H <sub>2</sub> O                                         |
| CaCO <sub>3</sub>       |                        | 8.59×10 <sup>-3</sup> | kg             |                                                                              |
| Mg(OH) <sub>2</sub>     |                        | 1.43×10 <sup>-5</sup> | kg             |                                                                              |
| MgCO <sub>3</sub>       |                        | 0.17                  | kg             |                                                                              |
| Liquefied petroleum gas | 4.64×10 <sup>-10</sup> |                       | kg             | Liquefied petroleum gases and other gaseous hydrocarbons, except natural gas |
| Natural gas             | 4.89×10 <sup>-8</sup>  |                       | m <sup>3</sup> | Natural gas, liquefied                                                       |
| Heavy fuel oil          | 7.86×10 <sup>-7</sup>  |                       | kW h           | Electricity from heavy fuel oil                                              |
| Electricity             | 0.349                  |                       | kW h           | Northern Chilean electricity grid mix                                        |
| Mother liquor           |                        | 7.95                  | kg             |                                                                              |
| Evaporated water        |                        | 0.119                 | kg             | Evaporated by drying process                                                 |
| Liquid waste            |                        | 11.8                  | kg             |                                                                              |
| Lithium carbonate       |                        | 1                     | kg             |                                                                              |

## 2. Waste management

The parameters used in waste management modelling are presented in this section.

Table A3. Parameters of waste management

| Description          | Value                                             | Unit            | Description                                                                                  |
|----------------------|---------------------------------------------------|-----------------|----------------------------------------------------------------------------------------------|
| $H_p$ (unlined)      | 18.2                                              | m               | Wastewater depth and depth of loose sediment. <sup>2</sup>                                   |
| $D_{fc}$             | 0.10                                              | m               | Thickness of consolidated sediment layer. <sup>3</sup>                                       |
| $D_{clog}$           | 0.50                                              | m               | Thickness of clogged soil layer. <sup>3</sup>                                                |
| $K_{fc}$             | $1.26 \times 10^{-9}$ to<br>$1.77 \times 10^{-9}$ | $m\ s^{-1}$     | Saturated hydraulic conductivity of the consolidated sediment. <sup>3</sup>                  |
| $K_{clog}$           | 10 % $K_{soil}$                                   | $m\ s^{-1}$     | Saturated hydraulic conductivity of the clogged soil. <sup>3</sup>                           |
| $K_{soil}$           | $1 \times 10^{-6}$                                | $m\ s^{-1}$     | Saturated hydraulic conductivity of native soil. <sup>4</sup>                                |
| $H_p$ (single lined) | 18.3                                              | m               | Wastewater depth and depth of loose sediment. <sup>2</sup>                                   |
| $D_{liner}$          | 0.916                                             | m               | Thickness of liner. <sup>2</sup>                                                             |
| $K_{liner}$          | $1 \times 10^{-9}$                                | $m\ s^{-1}$     | Saturated hydraulic conductivity of liner. <sup>2</sup>                                      |
| $A$                  | $10^{-5}$ to $10^{-4}$                            | $m^2$           | A defect area for liner. <sup>5</sup>                                                        |
| $K_s$                | $1 \times 10^{-9}$                                | $m\ s^{-1}$     | Hydraulic conductivity of the low-permeability soil underlying the geomembrane. <sup>2</sup> |
| $H$                  | $\leq 0.3$                                        | m               | The leachate head above the geomembrane component of the composite liner. <sup>5</sup>       |
| $P$                  | 1                                                 | Number per acre | Density of installation defects. <sup>5</sup>                                                |
| $S$                  | 537.9                                             | $m^2$           | Footprint of surface impoundment. <sup>6</sup>                                               |

### 3. Evaporation modelling

The parameters used in evaporation modelling are presented in Table A4. The temperature and relative humidity (RH) were sourced from SQM Meteorología Estación Meteorológica KCL<sup>7</sup>; the bright sunshine hours per day (n), the latitude of the site ( $\emptyset$ ) and the maximum possible duration of daylight (N) were sourced from Meteo Chile, Estación Cerro Moreno Antofagasta Ap. (230001), which is the nearest available meteorology station to the study area.<sup>8</sup>

Table A4. Parameters used in evaporation modelling.

| Parameter / Unit                             | January | February | March  | April  | May    | June   | July   | August | September | October | November | December |
|----------------------------------------------|---------|----------|--------|--------|--------|--------|--------|--------|-----------|---------|----------|----------|
| Number                                       | 1       | 2        | 3      | 4      | 5      | 6      | 7      | 8      | 9         | 10      | 11       | 12       |
| T / °C                                       | 17.31   | 17.84    | 18.02  | 15.77  | 12.81  | 8.32   | 8.81   | 12.61  | 14.76     | 16.53   | 17.32    | 18.90    |
| n / hours                                    | 11.43   | 10.83    | 10.17  | 9.24   | 7.33   | 6.94   | 6.48   | 7.25   | 6.69      | 6.94    | 8.19     | 9.85     |
| $\emptyset$ / rad                            | -0.411  | -0.411   | -0.411 | -0.411 | -0.411 | -0.411 | -0.411 | -0.411 | -0.411    | -0.411  | -0.411   | -0.411   |
| N / hours                                    | 13.48   | 12.91    | 12.10  | 11.26  | 10.62  | 10.36  | 10.55  | 11.14  | 11.96     | 12.80   | 13.42    | 13.64    |
| $R_s$ / MJ m <sup>-2</sup> d <sup>-1</sup>   | 23.99   | 23.97    | 23.69  | 22.79  | 20.95  | 20.42  | 20.27  | 21.29  | 21.27     | 21.46   | 22.01    | 22.88    |
| $R_s$ / kW h m <sup>-2</sup> d <sup>-1</sup> | 6.66    | 6.66     | 6.58   | 6.33   | 5.82   | 5.67   | 5.63   | 5.91   | 5.91      | 5.96    | 6.11     | 6.36     |
| $R_A$ / MJ m <sup>-2</sup> d <sup>-1</sup>   | 33.70   | 33.79    | 33.37  | 32.32  | 31.15  | 30.59  | 31.01  | 32.13  | 33.24     | 33.76   | 33.73    | 33.62    |
| $R_A$ / kW h m <sup>-2</sup> d <sup>-1</sup> | 9.36    | 9.38     | 9.27   | 8.98   | 8.65   | 8.50   | 8.61   | 8.92   | 9.23      | 9.38    | 9.37     | 9.34     |
| RH / %                                       | 25.86   | 32.80    | 36.31  | 24.05  | 17.46  | 14.94  | 15.55  | 13.48  | 12.96     | 17.46   | 13.75    | 12.83    |
| $E_{PEN}$ / mm d <sup>-1</sup>               | 8.47    | 7.72     | 7.47   | 6.78   | 5.69   | 4.60   | 4.70   | 5.87   | 6.71      | 7.55    | 7.95     | 8.58     |

#### 4. Evaporation correction

Detailed parameters used to implement the evaporation correction are presented in Table A5. The salinity reduction coefficient is related to the liquid density, calculated from equation 1.<sup>9</sup>

$$y = -3.7628x^2 + 6.3353x - 1.5725 \quad (R^2 = 0.9775) \quad (1)$$

Table A5. Parameters used to implement the evaporation correction.

| Description | Value | Unit                 | Description                                                        |
|-------------|-------|----------------------|--------------------------------------------------------------------|
| $K_e$       | 0.7   | 1                    | Pond coefficient (dimensionless), which equals to 0.7 <sup>9</sup> |
| $K_s$       | 0.55  | 1                    | Salinity reduction coefficient (dimensionless)                     |
| $E_t$       | -     | mm day <sup>-1</sup> | Evaporation rate of each scenario                                  |
| $X$         | 1.223 | g cm <sup>-3</sup>   | Average density of brine <sup>10</sup>                             |

#### 5. Water balance

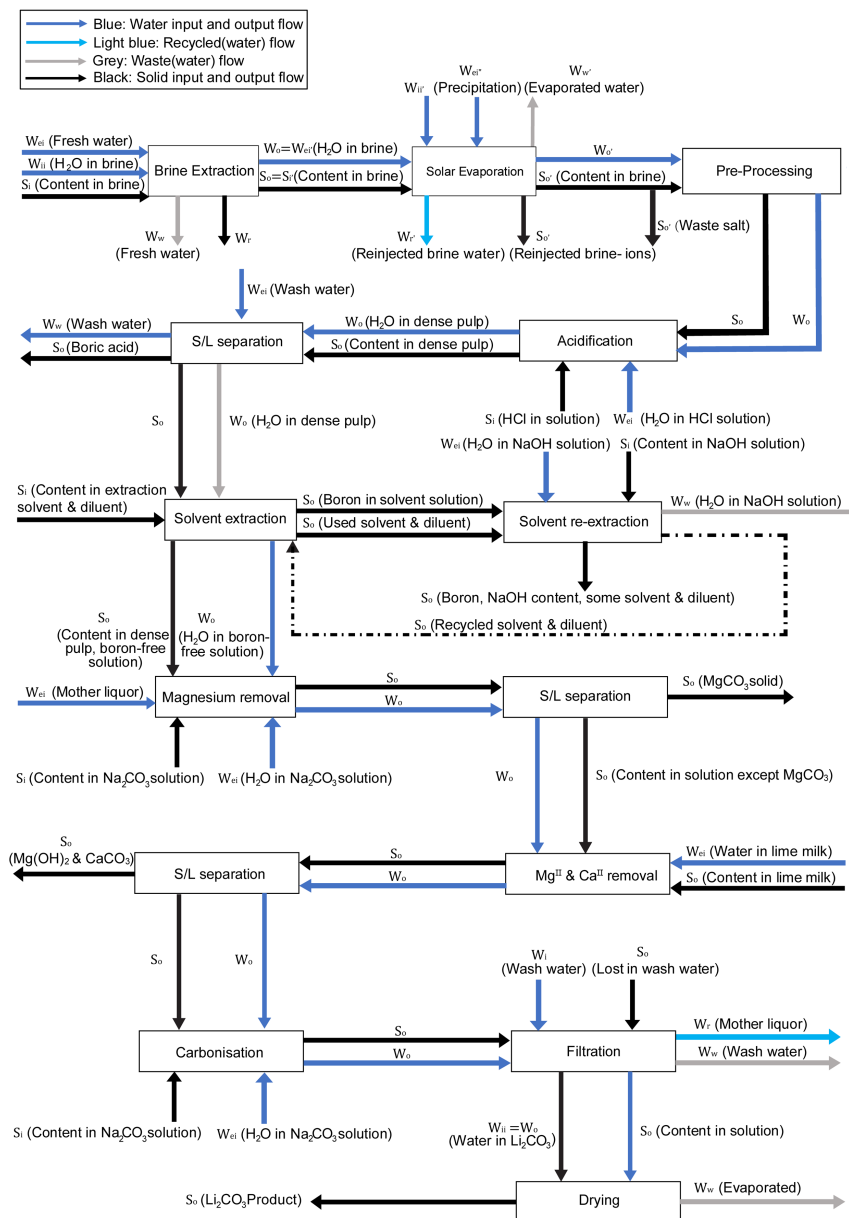

Fig. A1. Water balance flow chart of lithium carbonate production from brine.

## 6. Water Footprint

The detailed contributions to water footprint are shown in Fig. 9 in the article and the specific numbers for each contribution are summarised in Table A6 in the order of production.

Table A6. Contributions to water footprint.

| Description                          | Scenario 1            | Scenario 2            | Scenario 3            | Unit                            |
|--------------------------------------|-----------------------|-----------------------|-----------------------|---------------------------------|
| Precipitation                        | 1.03                  | 1.03                  | 1.03                  |                                 |
| Electricity supply at salar          | 0.623                 | 0.623                 | 0.623                 |                                 |
| Heavy fuel oil usage at salar        | $1.65 \times 10^{-6}$ | $1.65 \times 10^{-6}$ | $1.65 \times 10^{-6}$ |                                 |
| Diesel usage at salar                | $2.47 \times 10^{-5}$ | $2.47 \times 10^{-5}$ | $2.47 \times 10^{-5}$ |                                 |
| Evaporated water                     | 176.81                | 163.08                | 202.74                |                                 |
| Water pump operation                 | 0.736                 | 0.736                 | 0.736                 |                                 |
| Fresh water usage at salar           | 18.7                  | 18.7                  | 18.7                  |                                 |
| Electricity supply at plant          | 0.163                 | 0.163                 | 0.163                 | kg per kg                       |
| Heavy fuel oil usage at plant        | $1.27 \times 10^{-6}$ | $1.27 \times 10^{-6}$ | $1.27 \times 10^{-6}$ | Li <sub>2</sub> CO <sub>3</sub> |
| Liquefied petroleum gas usage        | $3.91 \times 10^{-9}$ | $3.91 \times 10^{-9}$ | $3.91 \times 10^{-9}$ |                                 |
| Liquefied natural gas usage          | $4.22 \times 10^{-8}$ | $4.22 \times 10^{-8}$ | $4.22 \times 10^{-8}$ |                                 |
| Hydrochloric acid usage              | 0.087                 | 0.311                 | 0.025                 |                                 |
| Market for soda ash                  | 29.19                 | 152.60                | 12.37                 |                                 |
| Market for quicklime                 | $1.98 \times 10^{-3}$ | $1.04 \times 10^{-2}$ | $8.42 \times 10^{-4}$ |                                 |
| Market for ultrapure water           | 5.91                  | 24.48                 | 3.32                  |                                 |
| Sodium hydroxide solution production | 105.12                | 551.69                | 44.74                 |                                 |

## References

- 1 Sphera Solutions, Life Cycle Assessment (LCA) Software <https://about.sphera.com/ps>.
- 2 U.S. Environmental Protection Agency, *EPA's Composite Model for Leachate Migration with Transformation Products (EPACMTP) Parameters/Data Background Document*, 2023.
- 3 U.S. Environmental Protection Agency, *EPA's Composite Model for Leachate Migration with Transformation Products (EPACMTP) Technical Background Document*, 2023.
- 4 B. Gómez-Silva, F. A. Rainey, K. A. Warren-Rhodes, C. P. McKay and R. Navarro-González, in *Microbiology of Extreme Soils*, eds. P. Dion and C. S. Nautiyal, Springer, Berlin, Heidelberg, 2008, pp. 117–132.
- 5 Z. Nie, PhD Thesis, Imperial College London.
- 6 Sociedad Química y Minera de Chile, *Technical Report Summary Operation Report Salar de Atacama*, Av. Las Condes 11.700, Vitacura. Santiago, Chile, 2022.
- 7 SQM monitor en línea, <https://www.sqmsenlinea.com/meteorology/232>, (accessed 3 April 2024).
- 8 Dirección Meteorológica de Chile, Dirección Meteorológica de Chile, <https://www.meteochile.gob.cl/PortalDMC-web/index.xhtml>, (accessed 26 January 2024).
- 9 L. Mardones, *El litio, un nuevo recurso para Chile*, 1986, 181–216.
- 10 V. Schenker, C. Oberschelp and S. Pfister, *Resources, Conservation and Recycling*, 2022, **187**, 106611.
